# Supplementary material for: Mint3 depletion restricts tumor malignancy of pancreatic cancer cells by decreasing SKP2 expression via HIF-1
Source: PubMed Central journal article supplement (PMC7515798; doi:10.1038/s41388-020-01423-8), 2020-08-21
Supplement: 41388_2020_1423_MOESM2_ESM.pdf [file 41388_2020_1423_MOESM2_ESM.pdf]

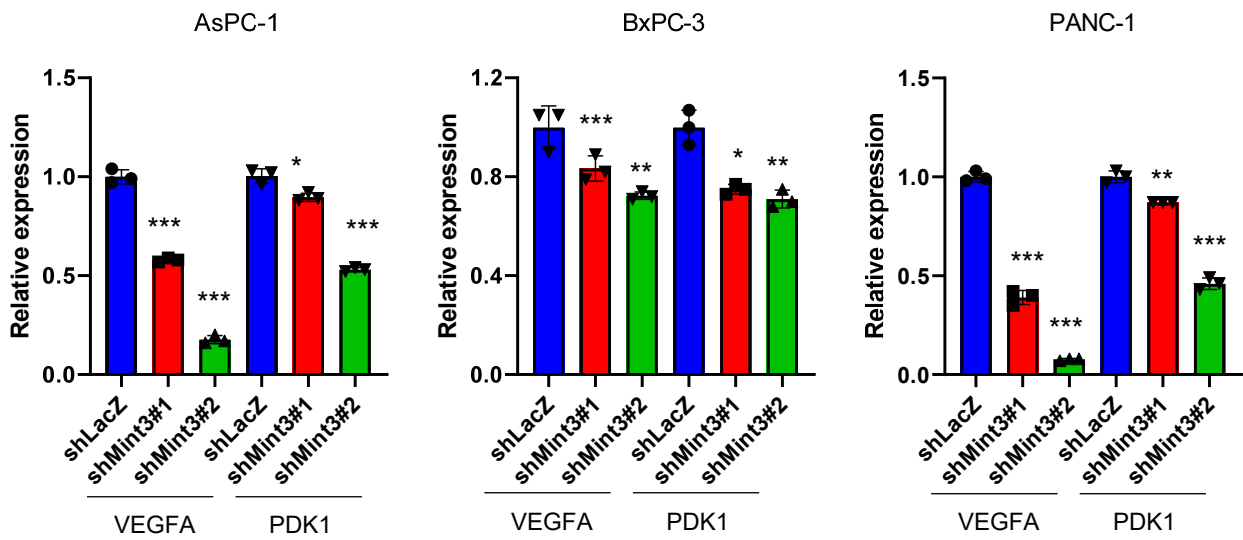

**Supplementary Figure 1. Mint3 depletion attenuates expression of HIF-1 target genes in pancreatic cancer cells.**

mRNA levels of the HIF-1 target genes *VEGFA* and *PDK1* in control (shLacZ) and Mint3-depleted (shMint3#1, #2) pancreatic cancer cells. Error bars indicate SD (n = 3). \* $p < 0.05$ , \*\* $p < 0.01$ , \*\*\* $p < 0.001$  ( $t$ -test).
