# Supplementary material for: Mint3 depletion restricts tumor malignancy of pancreatic cancer cells by decreasing SKP2 expression via HIF-1
Source: PubMed Central journal article supplement (PMC7515798; doi:10.1038/s41388-020-01423-8), 2020-08-21
Supplement: 41388_2020_1423_MOESM3_ESM.pdf [file 41388_2020_1423_MOESM3_ESM.pdf]

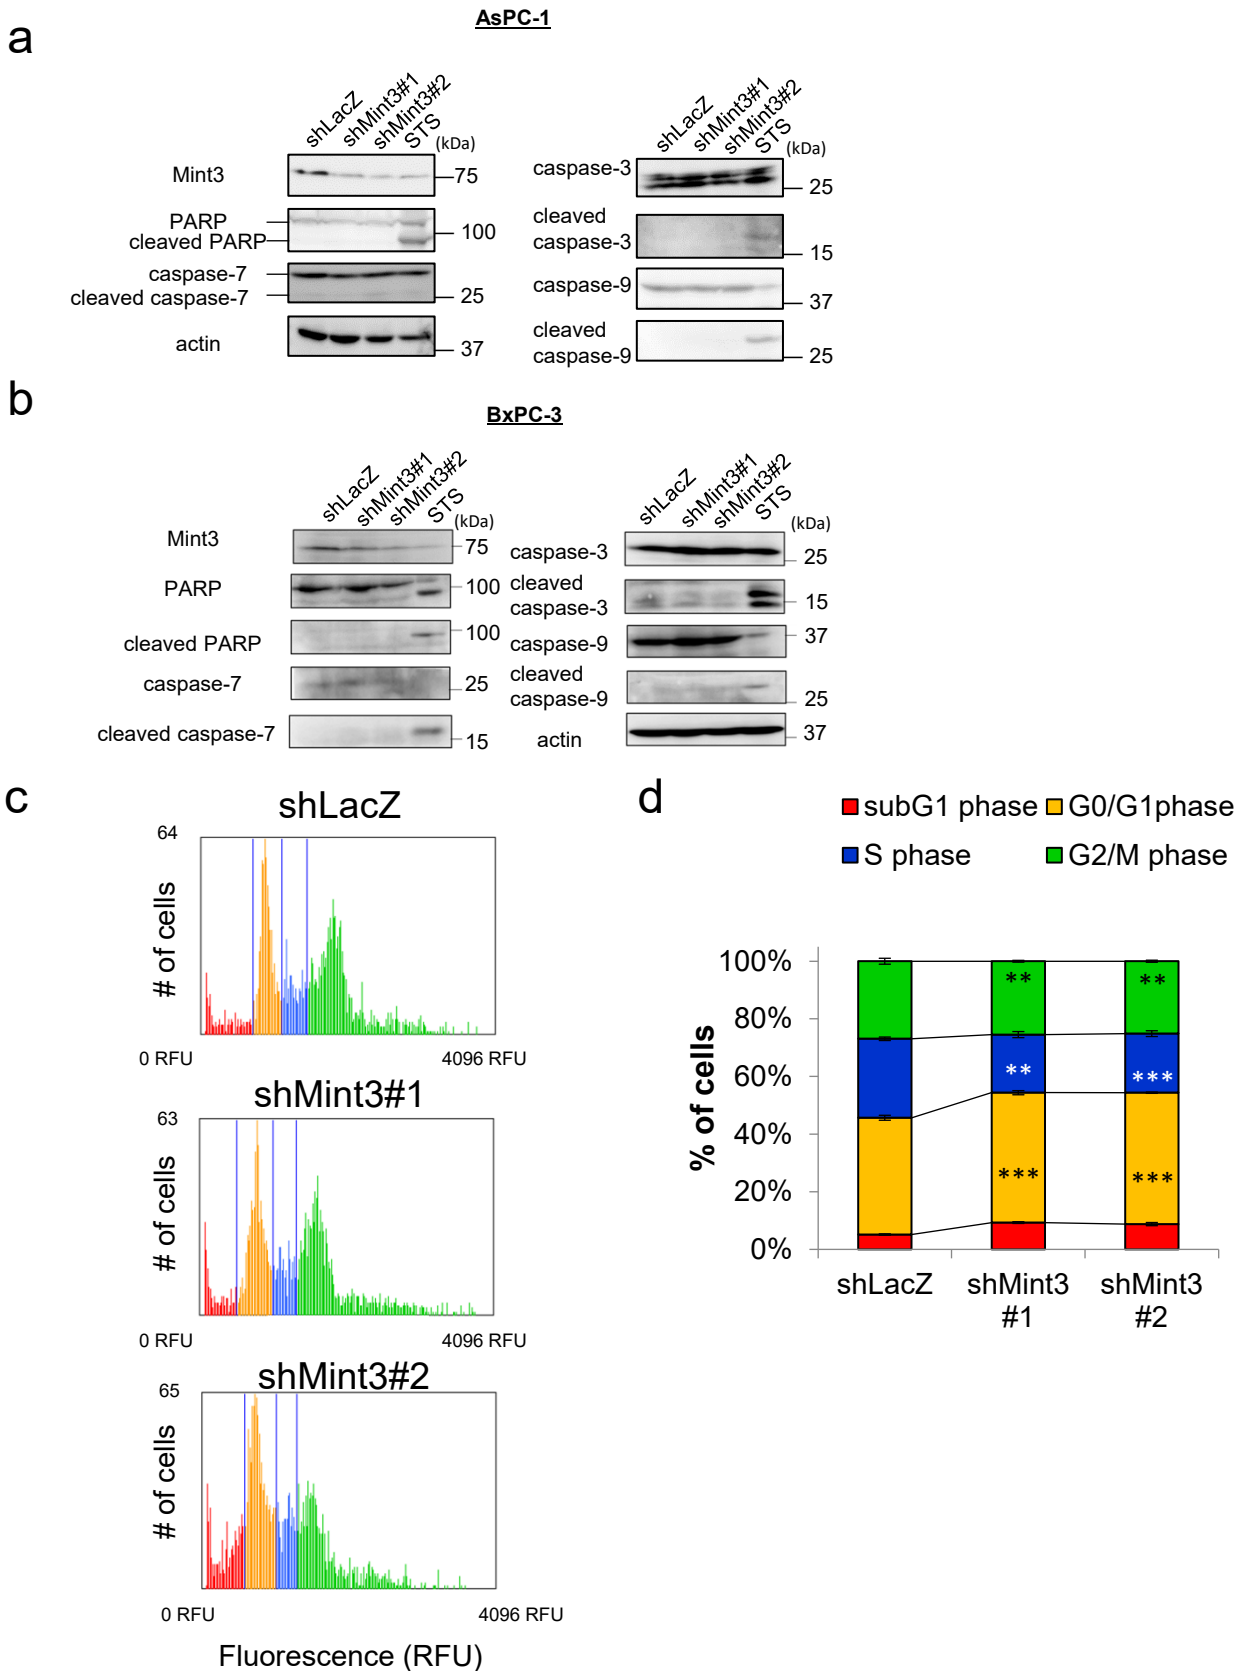

**Supplementary Figure 2. Mint3 depletion does not affect expression of apoptosis-related proteins in pancreatic cancer cells.**

(a, b) Immunoblotting of apoptosis-related proteins in control (shLacZ) and Mint3-depleted (shMint3) AsPC-1 (a) and BxPC-3 cells (b). Staurosporine (STS; 500 nM) treatment for 5 h was used as a positive control for apoptosis.

(c, d) Cell cycle analysis of control and Mint3-depleted BxPC-3 cells. (c) Representative graphs of propidium iodide staining. (d) The distribution of each cell cycle phase in BxPC-3 cells was analyzed. Error bars indicate SD (n = 3). \*  $p < 0.01$ , \*\*\*  $p < 0.001$  (*t*-test).
