# Supplementary material for: Mint3 depletion restricts tumor malignancy of pancreatic cancer cells by decreasing SKP2 expression via HIF-1
Source: PubMed Central journal article supplement (PMC7515798; doi:10.1038/s41388-020-01423-8), 2020-08-21

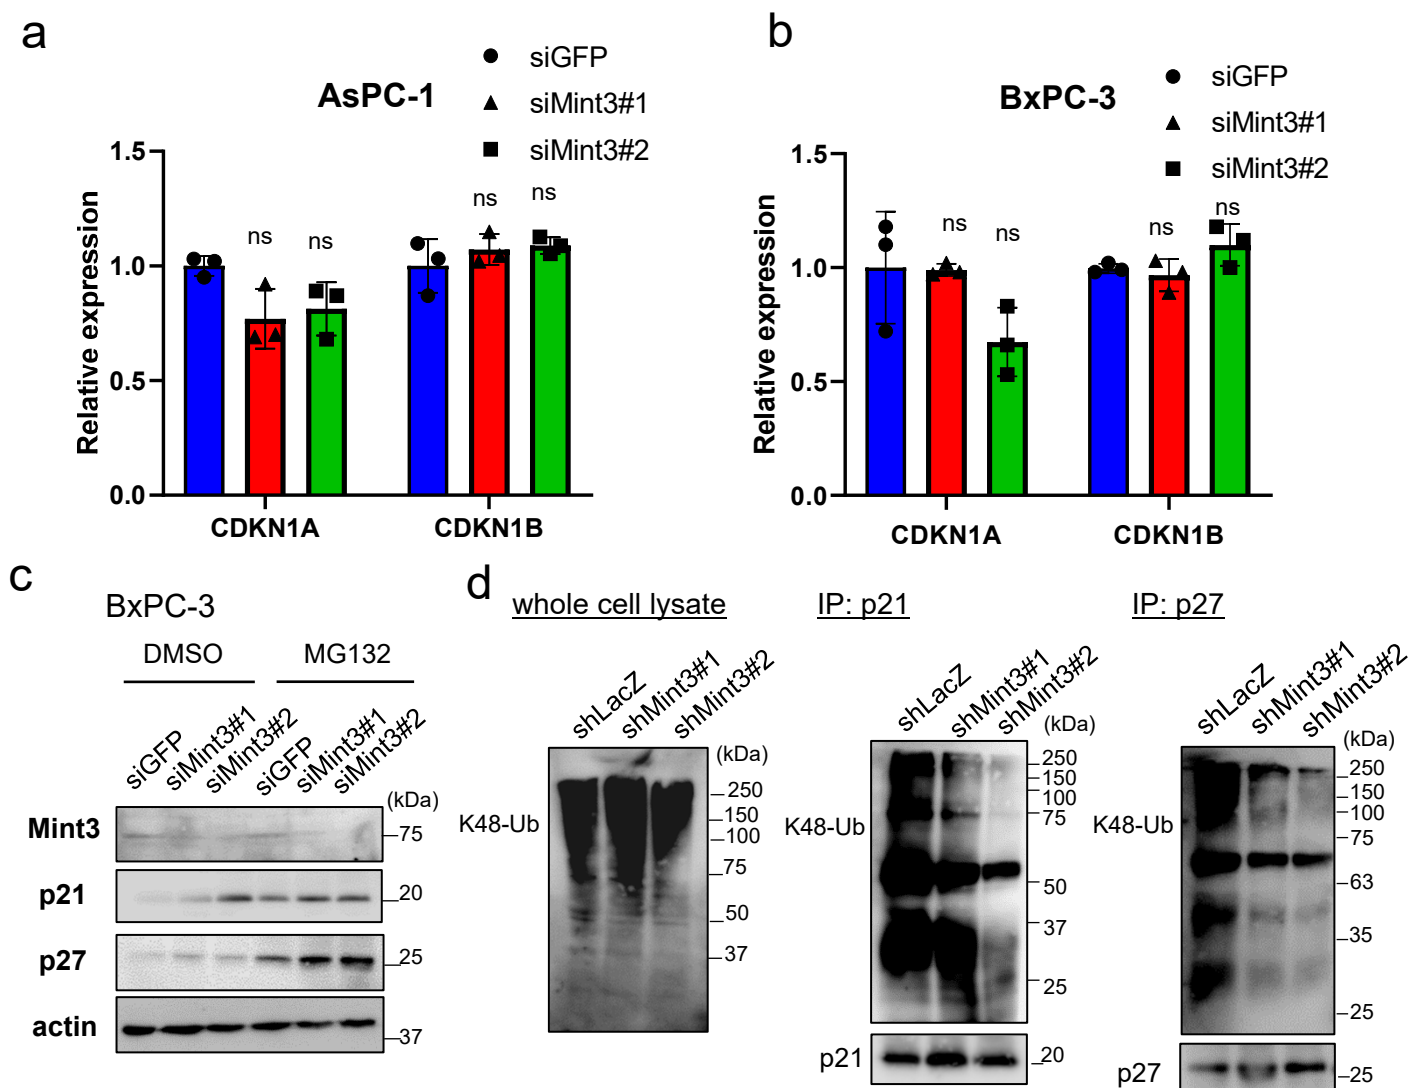

Supplement: 41388_2020_1423_MOESM4_ESM.pdf [file 41388_2020_1423_MOESM4_ESM.pdf]
