# Supplementary material for: Mint3 depletion restricts tumor malignancy of pancreatic cancer cells by decreasing SKP2 expression via HIF-1
Source: PubMed Central journal article supplement (PMC7515798; doi:10.1038/s41388-020-01423-8), 2020-08-21
Supplement: 41388_2020_1423_MOESM5_ESM.pdf [file 41388_2020_1423_MOESM5_ESM.pdf]

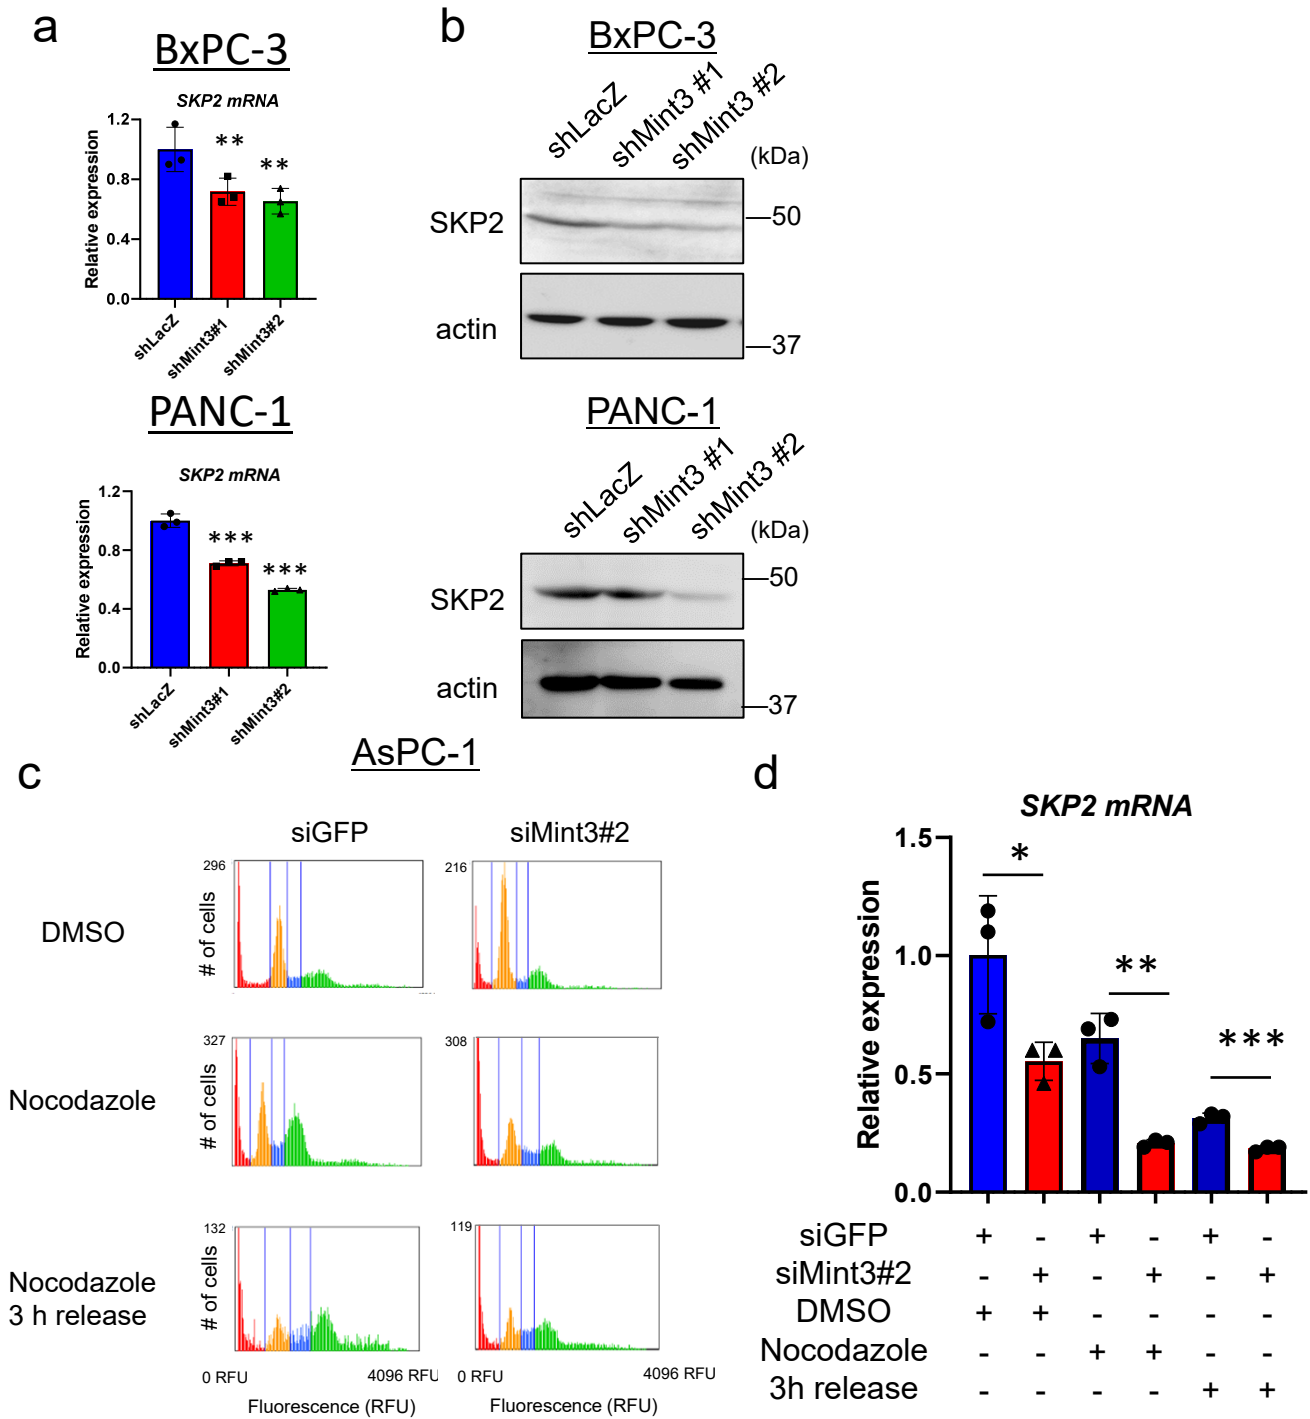

**Supplementary Figure 4. Mint3 depletion decreases SKP2 mRNA levels in pancreatic cancer cells.**

(a) *SKP2* mRNA levels in control (shLacZ) and Mint3-depleted (shMint3) BxPC-3 and PANC-1 cells. Expression levels were normalized to *ACTB*.

(b) SKP2 protein expression in control (shLacZ) and Mint3-depleted BxPC-3 and PANC-1 cells.

(c, d) Representative PI staining (c) and *SKP2* mRNA levels (d) in control (siGFP) and Mint3-depleted (siMint3) AsPC-1 cells were synchronized by nocodazole (10  $\mu$ M) treatment for 16 h and cultured without nocodazole for 3 h after nocodazole treatment.

Error bars indicate SD (n = 3). \* $p$  < 0.05, \*\* $p$  < 0.01, \*\*\* $p$  < 0.001 ( $t$ -test).
