# Supplementary material for: Mint3 depletion restricts tumor malignancy of pancreatic cancer cells by decreasing SKP2 expression via HIF-1
Source: PubMed Central journal article supplement (PMC7515798; doi:10.1038/s41388-020-01423-8), 2020-08-21
Supplement: 41388_2020_1423_MOESM6_ESM.pdf [file 41388_2020_1423_MOESM6_ESM.pdf]

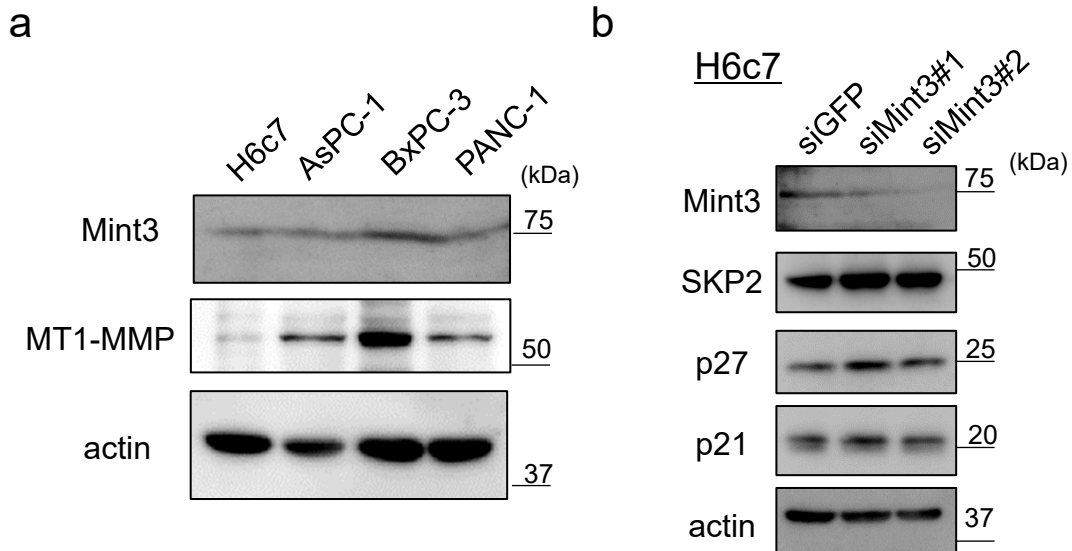

**Supplementary Figure 5. Mint3 does not control SKP2 expression in pancreatic epithelial H6c7 cells.**

(a) Immunoblot of Mint3, MT1-MMP, and actin in immortalized pancreatic duct epithelial H6c7 cells and pancreatic cancer AsPC-1, BxPC-3, and PANC-1 cells.

(b) Immunoblot of in H6c7 cells treated with control siRNA (siGFP) or Mint3 siRNA (siMint3#1, #2).
