# Supplementary material for: Mint3 depletion restricts tumor malignancy of pancreatic cancer cells by decreasing SKP2 expression via HIF-1
Source: PubMed Central journal article supplement (PMC7515798; doi:10.1038/s41388-020-01423-8), 2020-08-21
Supplement: 41388_2020_1423_MOESM8_ESM.pdf [file 41388_2020_1423_MOESM8_ESM.pdf]

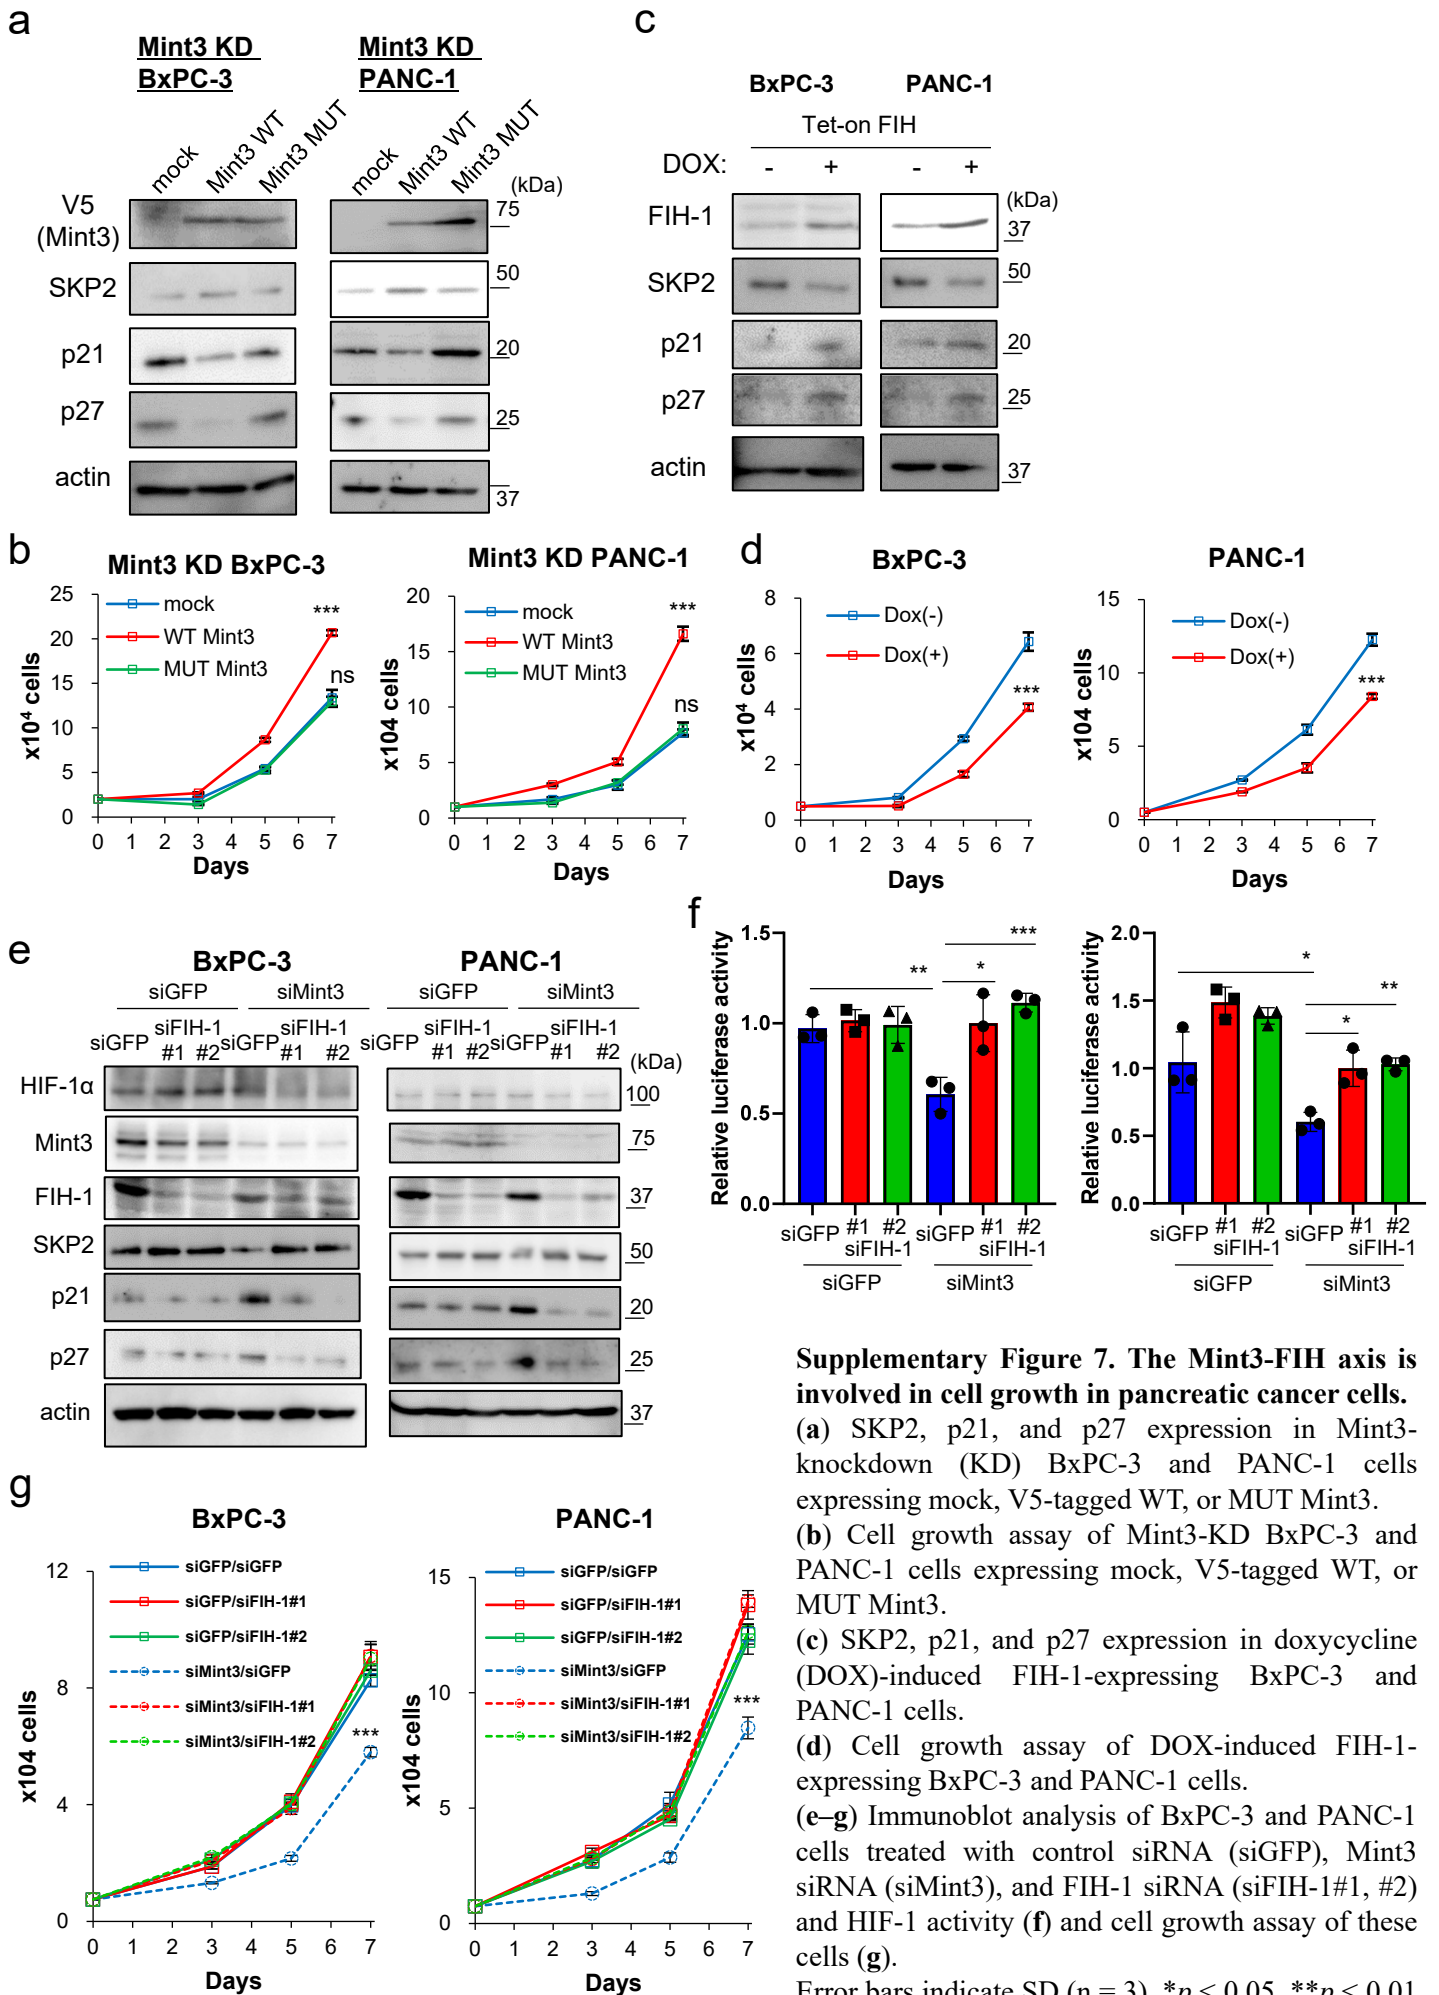

**Supplementary Figure 7. The Mint3-FIH axis is involved in cell growth in pancreatic cancer cells.**

(a) SKP2, p21, and p27 expression in Mint3-knockdown (KD) BxPC-3 and PANC-1 cells expressing mock, V5-tagged WT, or MUT Mint3.

(b) Cell growth assay of Mint3-KD BxPC-3 and PANC-1 cells expressing mock, V5-tagged WT, or MUT Mint3.

(c) SKP2, p21, and p27 expression in doxycycline (DOX)-induced FIH-1-expressing BxPC-3 and PANC-1 cells.

(d) Cell growth assay of DOX-induced FIH-1-expressing BxPC-3 and PANC-1 cells.

(e–g) Immunoblot analysis of BxPC-3 and PANC-1 cells treated with control siRNA (siGFP), Mint3 siRNA (siMint3), and FIH-1 siRNA (siFIH-1#1, #2) and HIF-1 activity (f) and cell growth assay of these cells (g).

Error bars indicate SD (n = 3). \**p* < 0.05, \*\**p* < 0.01, \*\*\**p* < 0.001, ns, not significant (*t*-test).
