# Supplementary material for: Mint3 depletion restricts tumor malignancy of pancreatic cancer cells by decreasing SKP2 expression via HIF-1
Source: PubMed Central journal article supplement (PMC7515798; doi:10.1038/s41388-020-01423-8), 2020-08-21
Supplement: 41388_2020_1423_MOESM9_ESM.pdf [file 41388_2020_1423_MOESM9_ESM.pdf]

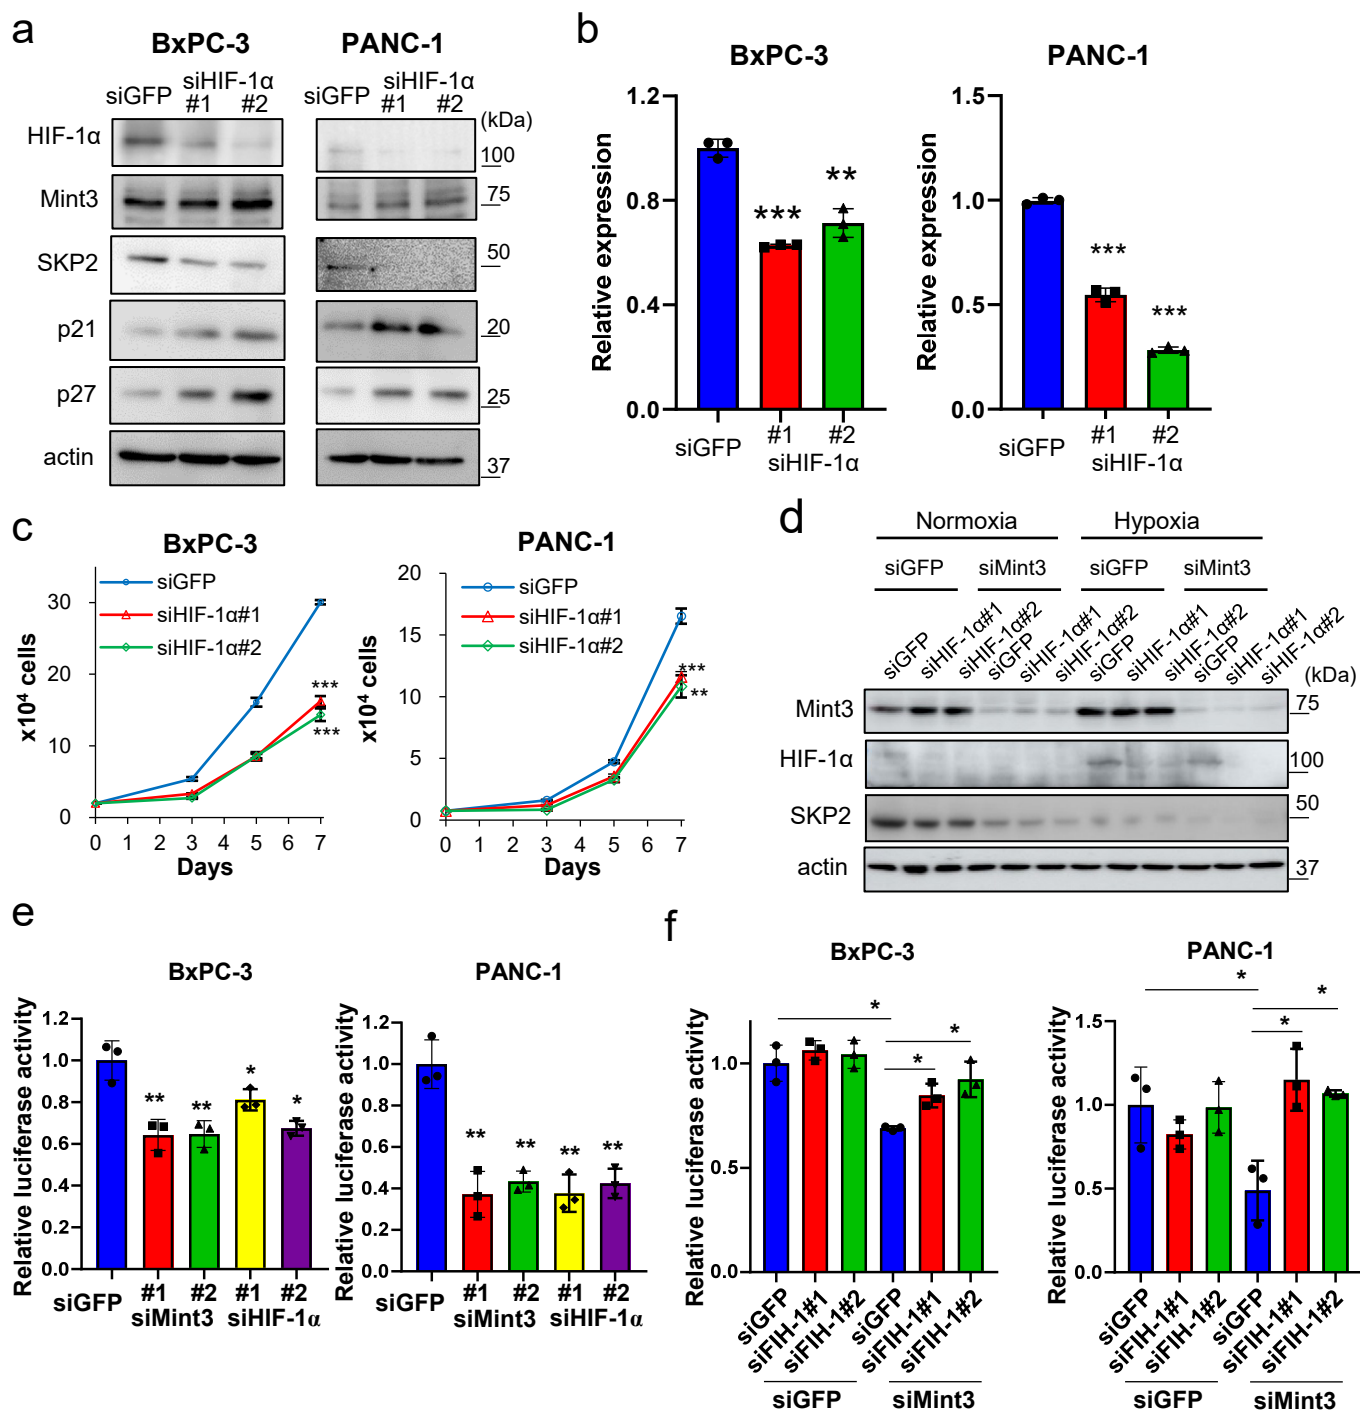

**Supplementary Figure 8. HIF-1 $\alpha$  depletion decreases SKP2 expression and cell growth in pancreatic cancer cells.**

(a) SKP2, p21, and p27 expression in control (siGFP) and HIF-1 $\alpha$ -depleted (siHIF-1 $\alpha$ #1, #2) BxPC-3 and PANC-1 cells.

(b) SKP2 mRNA levels in BxPC-3 and PANC-1 cells transfected with control siRNA or HIF-1 $\alpha$  siRNA. Expression levels were normalized to *ACTB*.

(c, d) Cell growth (c) and HIF-1 $\alpha$  activity (d) of control and HIF-1 $\alpha$ -depleted BxPC-3 and PANC-1 cells.

(e) Immunoblotting of HIF-1 $\alpha$ , Mint3, and SKP2 in AsPC-1 cells transfected with siGFP, siMint3, and siHIF-1 $\alpha$  during normoxia and hypoxia.

(f) SKP2 promoter activity in BxPC-3 and PANC-1 cells transfected with siGFP, siMint3, and siHIF-1 $\alpha$ .

(g) SKP2 promoter activity in BxPC-3 and PANC-1 cells transfected with siGFP, siMint3, and siFIH-1.

Error bars indicate SD (n = 3). \* $p$  < 0.05, \*\* $p$  < 0.01, \*\*\* $p$  < 0.001 ( $t$ -test).
