# Supplementary material for: Mint3 depletion restricts tumor malignancy of pancreatic cancer cells by decreasing SKP2 expression via HIF-1
Source: PubMed Central journal article supplement (PMC7515798; doi:10.1038/s41388-020-01423-8), 2020-08-21
Supplement: 41388_2020_1423_MOESM10_ESM.pdf [file 41388_2020_1423_MOESM10_ESM.pdf]

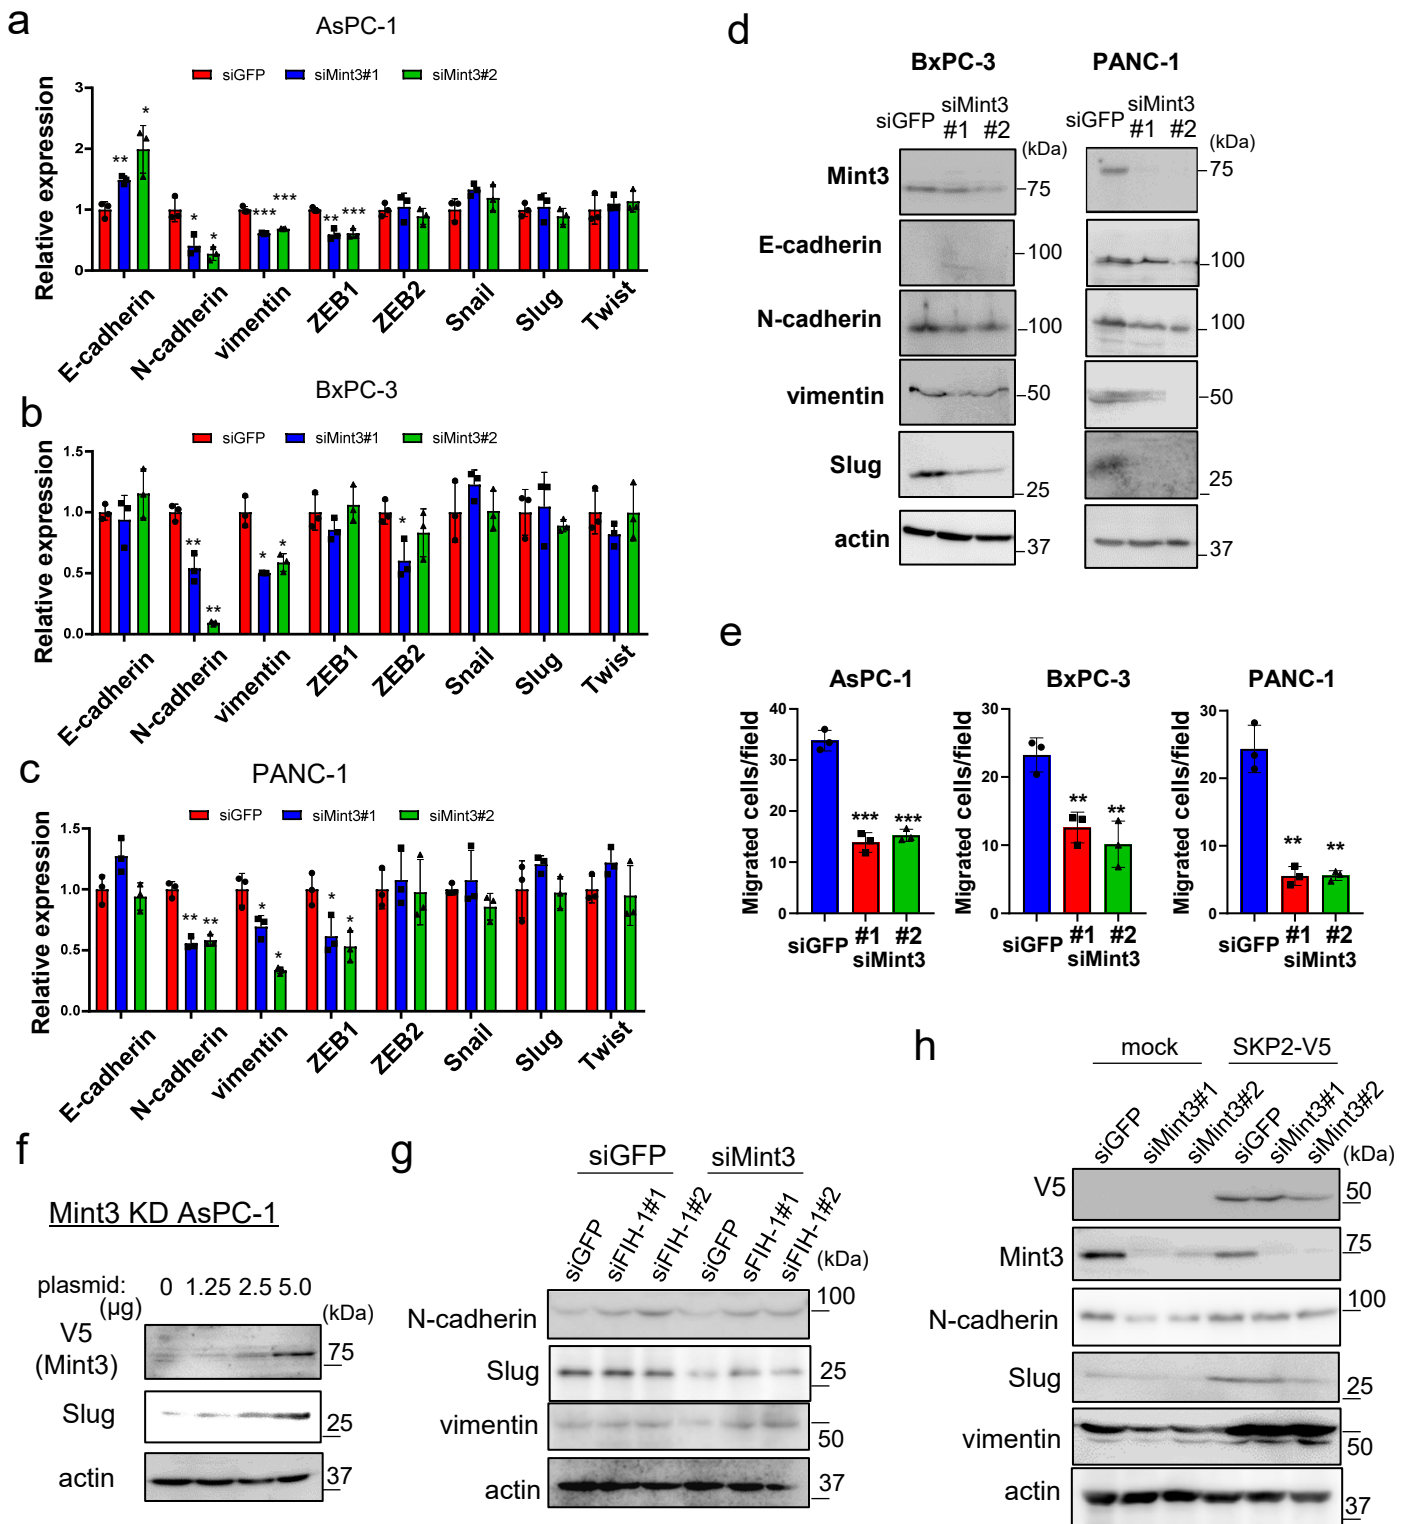

**Supplementary Figure 9. Mint3 depletion attenuates mesenchymal features in pancreatic cancer cells.**

(a–c) mRNA levels of EMT-related genes in AsPC-1 (a), BxPC-3 (b), and PANC-1 cells (c) transfected with control siRNA (siGFP) or Mint3 siRNA (siMint3#1, #2). Expression levels were normalized to *ACTB*.

(d) Immunoblotting of EMT-related proteins in control (siGFP) and Mint3-depleted (siMint3) BxPC-3 and PANC-1 cells.

(e) Transwell migration assays of control and Mint3-depleted AsPC-1, BxPC-3, and PANC-1 cells.

(f) V5-tagged Mint3 was transiently expressed in Mint3-depleted AsPC-1 cells at various levels and Slug expression was analyzed by immunoblotting.

(g) Immunoblotting of EMT-related proteins in control (siGFP), Mint3-depleted (siMint3), and FIH-1-depleted (siFIH-1) AsPC-1 cells.

(h) Immunoblotting of EMT-related proteins in control (siGFP) and Mint3-depleted (siMint3) AsPC-1 cells expressing mock or V5-tagged SKP2.

Error bars indicate SD (n = 3). \* $p < 0.05$ , \*\* $p < 0.01$ , \*\*\* $p < 0.001$  (*t*-test).
