# Supplementary material for: Mint3 depletion restricts tumor malignancy of pancreatic cancer cells by decreasing SKP2 expression via HIF-1
Source: PubMed Central journal article supplement (PMC7515798; doi:10.1038/s41388-020-01423-8), 2020-08-21
Supplement: 41388_2020_1423_MOESM11_ESM.pdf [file 41388_2020_1423_MOESM11_ESM.pdf]

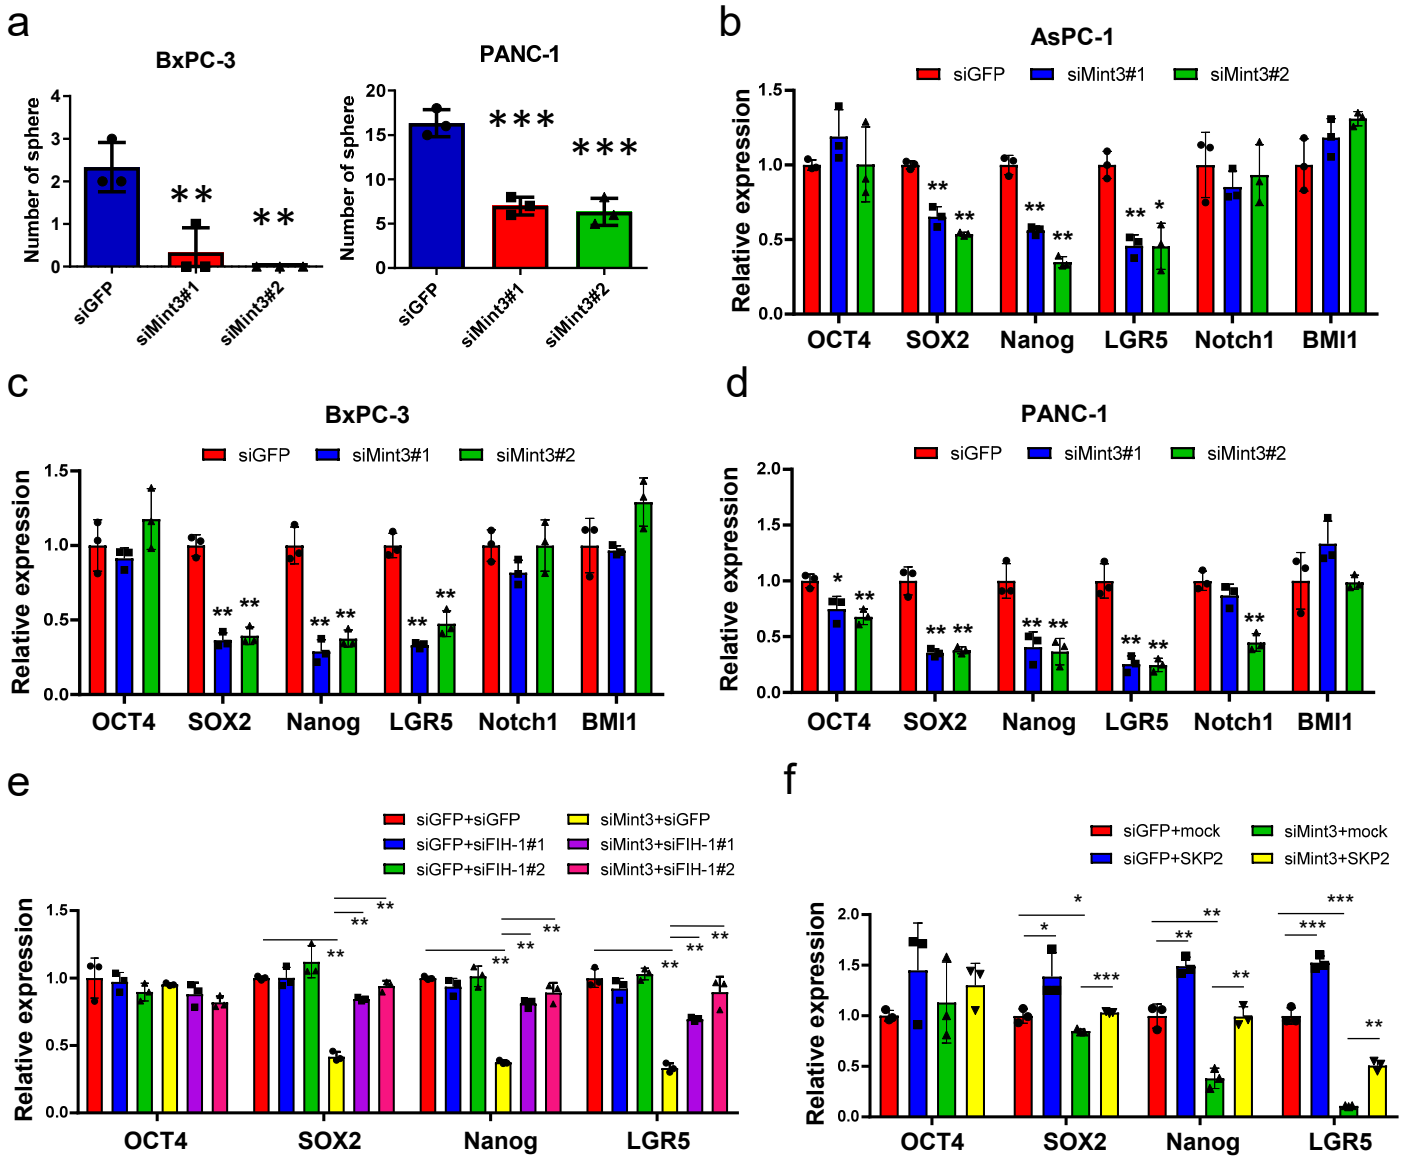

**Supplementary Figure 10. Mint3 controls stemness in a FIH-1- and SKP2-dependent manner.**

(a) Sphere formation assay of control (siGFP) and Mint3-depleted (siMint3) PANC-1 and BxPC-3 cells.

(b–d) mRNA levels of stemness marker genes in AsPC-1 (b), BxPC-3 (c), and PANC-1 cells (d) transfected with control siRNA (siGFP) or Mint3 siRNA (siMint3#1, #2).

(e) mRNA levels of stemness-related genes in control (siGFP), Mint3-depleted (siMint3), and FIH-1-depleted (siFIH-1) AsPC-1 cells.

(f) mRNA levels of stemness-related genes in control (siGFP) and Mint3-depleted (siMint3) AsPC-1 cells expressing mock or V5-tagged SKP2.

Expression levels were normalized to *ACTB*. Error bars indicate SD (n = 3). \* $p < 0.05$ , \*\* $p < 0.01$ , \*\*\* $p < 0.001$ , ns, not significant (*t*-test).
