# Supplementary material for: Mint3 depletion restricts tumor malignancy of pancreatic cancer cells by decreasing SKP2 expression via HIF-1
Source: PubMed Central journal article supplement (PMC7515798; doi:10.1038/s41388-020-01423-8), 2020-08-21
Supplement: 41388_2020_1423_MOESM12_ESM.pdf [file 41388_2020_1423_MOESM12_ESM.pdf]

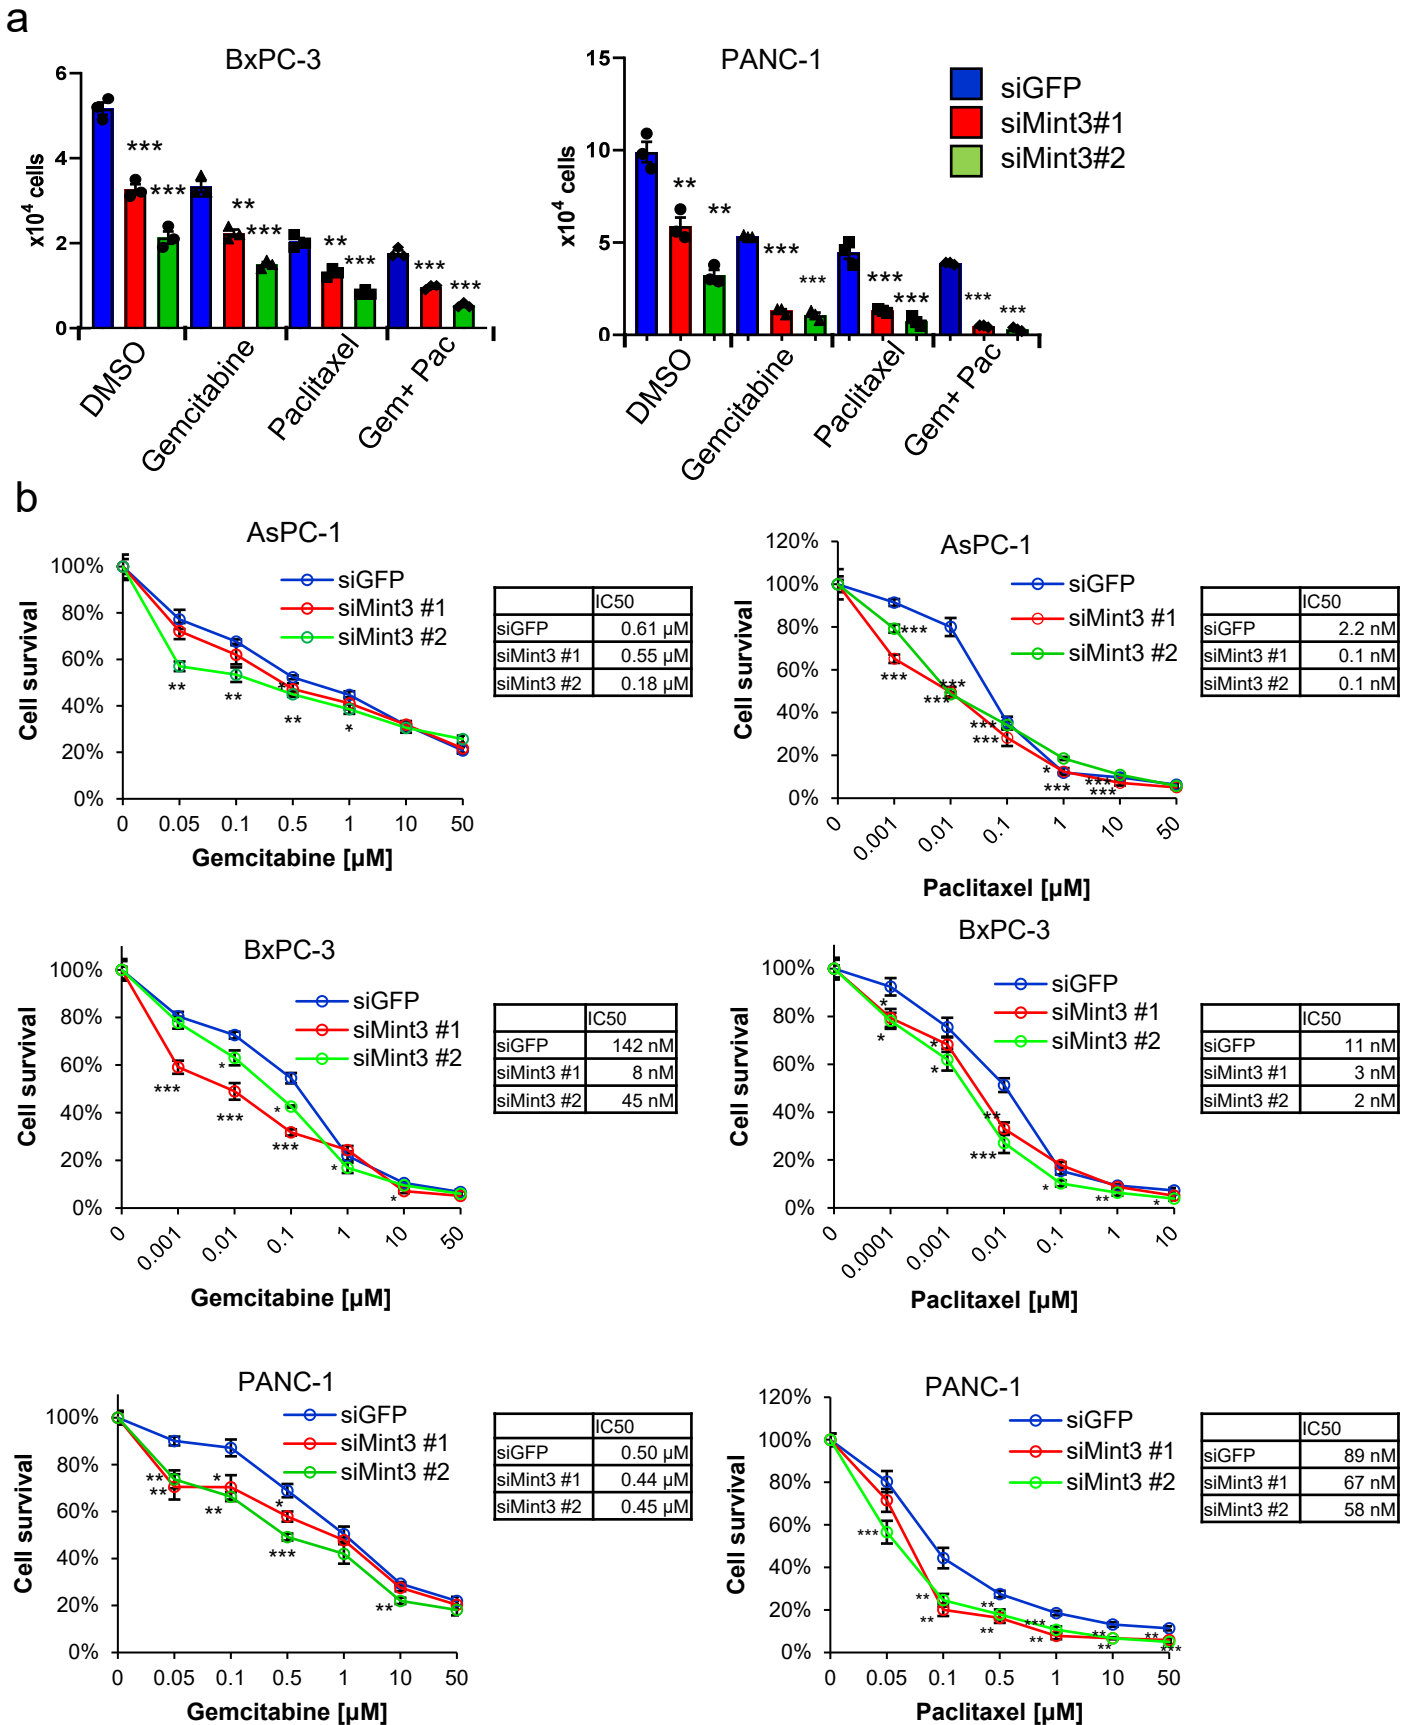

**Supplementary Figure 11. Mint3 depletion attenuates chemoresistance in BxPC-3 and PANC-1 cells.**

(a) Control (siGFP) and Mint3-depleted (siMint3) BxPC-3 (left) and PANC-1 cells (right) were counted after treatment with DMSO, gemcitabine (50 nM for BxPC-3 and 50  $\mu$ M for PANC-1), paclitaxel (5 nM for BxPC-3 and 50  $\mu$ M for PANC-1), or both gemcitabine and paclitaxel for 3 days.

(b) Cell survival of pancreatic cancer cells treated with different concentrations of gemcitabine or paclitaxel. Cells were counted after treatment with DMSO, gemcitabine, or paclitaxel for 3 days.

Error bars indicate SD (n = 3). \* $p$  < 0.05, \*\* $p$  < 0.01, \*\*\* $p$  < 0.001 ( $t$ -test).
