# Supplementary material for: Mint3 depletion restricts tumor malignancy of pancreatic cancer cells by decreasing SKP2 expression via HIF-1
Source: PubMed Central journal article supplement (PMC7515798; doi:10.1038/s41388-020-01423-8), 2020-08-21
Supplement: 41388_2020_1423_MOESM14_ESM.pdf [file 41388_2020_1423_MOESM14_ESM.pdf]

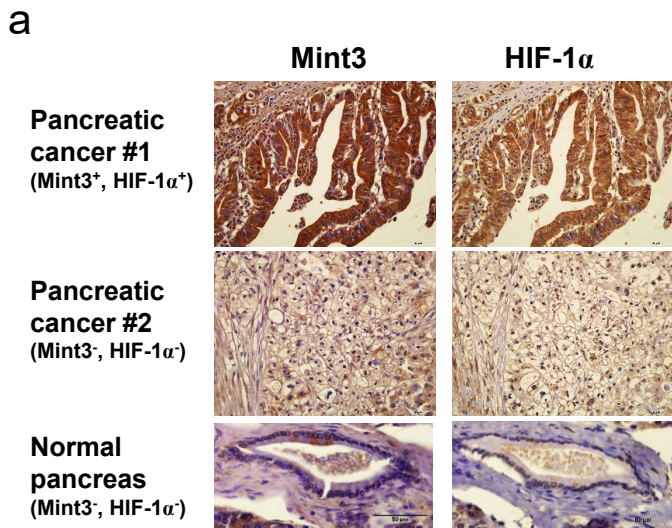

**b**

|                                            | Mint3 expression |          | P value    |
|--------------------------------------------|------------------|----------|------------|
|                                            | Positive         | Negative |            |
| <b>HIF-1<math>\alpha</math> expression</b> |                  |          |            |
| Positive                                   | 21               | 2        | P = 0.0073 |
| Negative                                   | 8                | 8        |            |

**Supplementary Figure 13. Immunostaining of Mint3 and HIF-1 $\alpha$  in pancreatic cancer specimens.**

(a) Representative immunostaining of the indicated proteins in pancreatic cancer and normal pancreas. (b) Correlation between Mint3 and HIF-1 $\alpha$  staining in pancreatic cancer was analyzed using pancreatic cancer tissue microarrays. Correlation of Mint3 and HIF-1 $\alpha$  protein expression was statistically analyzed using the Chi-squared test.
